# Supplementary material for: Klebsiella pneumoniae Oropharyngeal Carriage in Rural and Urban Vietnam and the Effect of Alcohol Consumption
Source: PubMed Central journal article supplement (PMC3965401; doi:10.1371/journal.pone.0091999), 2014-03-25

Participant ID Number

**General Questionnaire:**

|                                                        |                                                                                                                                                                                                         |                                           |                                                   |
|--------------------------------------------------------|---------------------------------------------------------------------------------------------------------------------------------------------------------------------------------------------------------|-------------------------------------------|---------------------------------------------------|
| <b>1. Participant ID</b>                               | <input type="checkbox"/> |                                           |                                                   |
| 1.1. Date of Birth or Age                              | __ / __ / __<br>dd / mm / yy                                                                                                                                                                            |                                           | Age ____ years                                    |
| 1.2. Site                                              | <b>DoDa</b> <input type="checkbox"/>                                                                                                                                                                    | <b>Ba Vi</b> <input type="checkbox"/>     |                                                   |
| 1.3. Interview Date                                    | __ / __ / __ (Day/Month/Year)                                                                                                                                                                           |                                           |                                                   |
| 1.4. Name of interviewer                               |                                                                                                                                                                                                         |                                           |                                                   |
| <b>2. Medical History</b>                              | <b>Yes</b>                                                                                                                                                                                              | <b>No</b>                                 | <b>Unknown</b>                                    |
| 2.1 Diabetes                                           | <input type="checkbox"/>                                                                                                                                                                                | <input type="checkbox"/>                  | <input type="checkbox"/>                          |
| 2.2. Renal disease*                                    | <input type="checkbox"/>                                                                                                                                                                                | <input type="checkbox"/>                  | <input type="checkbox"/>                          |
| 2.3. Liver disease*                                    | <input type="checkbox"/>                                                                                                                                                                                | <input type="checkbox"/>                  | <input type="checkbox"/>                          |
| 2.4. Lung disease*                                     | <input type="checkbox"/>                                                                                                                                                                                | <input type="checkbox"/>                  | <input type="checkbox"/>                          |
| 2.5. Heart disease*                                    | <input type="checkbox"/>                                                                                                                                                                                | <input type="checkbox"/>                  | <input type="checkbox"/>                          |
| 2.6. Malignancy*                                       | <input type="checkbox"/>                                                                                                                                                                                | <input type="checkbox"/>                  | <input type="checkbox"/>                          |
| 2.7. HIV                                               | <input type="checkbox"/>                                                                                                                                                                                | <input type="checkbox"/>                  | <input type="checkbox"/>                          |
| 2.8. Tonsillectomy                                     | <input type="checkbox"/>                                                                                                                                                                                | <input type="checkbox"/>                  | <input type="checkbox"/>                          |
| 2.9. Splenectomy                                       | <input type="checkbox"/>                                                                                                                                                                                | <input type="checkbox"/>                  | <input type="checkbox"/>                          |
| 2.10 Do you smoke?                                     | <input type="checkbox"/>                                                                                                                                                                                | <input type="checkbox"/>                  | <input type="checkbox"/>                          |
| 2.11. Any other ongoing illness requiring treatment    | <input type="checkbox"/><br>go to 2.12                                                                                                                                                                  | <input type="checkbox"/><br>go to 2.13    | <input type="checkbox"/><br>go to 2.13            |
| 2.12. Name/description of any ongoing illnesses listed |                                                                                                                                                                                                         |                                           |                                                   |
| 2.13. Are you currently taking any medications?        | <input type="checkbox"/> yes<br>go to 2.14                                                                                                                                                              | <input type="checkbox"/> no<br>go to 2.15 | <input type="checkbox"/> don't know<br>go to 2.15 |

|                                                                                                             |                                                                                                                                                                                                                                                                                                                                                       |                                                                                                                               |                                                |  |
|-------------------------------------------------------------------------------------------------------------|-------------------------------------------------------------------------------------------------------------------------------------------------------------------------------------------------------------------------------------------------------------------------------------------------------------------------------------------------------|-------------------------------------------------------------------------------------------------------------------------------|------------------------------------------------|--|
| 2.14.                                                                                                       | Name(s)                                                                                                                                                                                                                                                                                                                                               | Tick if daily<br><input type="checkbox"/><br><input type="checkbox"/><br><input type="checkbox"/><br><input type="checkbox"/> |                                                |  |
| 2.15. Have you taken antibiotics in the past 4 weeks (See annex 3 for a list of commonly used antibiotics)? | <input type="checkbox"/> yes<br>go to 2.16                                                                                                                                                                                                                                                                                                            | <input type="checkbox"/> no<br>go to 3                                                                                        | <input type="checkbox"/> don't know<br>go to 3 |  |
| 2.16 If yes, specify name(s) of antibiotic:                                                                 |                                                                                                                                                                                                                                                                                                                                                       |                                                                                                                               |                                                |  |
| <b>3. Hanoi travel (Ba Vi site only)</b>                                                                    | <b>Yes</b>                                                                                                                                                                                                                                                                                                                                            | <b>No</b>                                                                                                                     | <b>Unknown</b>                                 |  |
| 3.1. Did you travel to central Ha Noi in the last year?                                                     | <input type="checkbox"/> go to 3.2                                                                                                                                                                                                                                                                                                                    | <input type="checkbox"/> go to 4                                                                                              | <input type="checkbox"/> go to 4               |  |
| 3.2 If yes (tick one),                                                                                      | <p>Most days a week? <input type="checkbox"/></p> <p>At least once/week but not most days? <input type="checkbox"/></p> <p>At least once/month but not each week? <input type="checkbox"/></p> <p>Less than monthly, but not never? <input type="checkbox"/></p> <p>Don't know <input type="checkbox"/></p> <p>Won't say <input type="checkbox"/></p> |                                                                                                                               |                                                |  |
| 4. JE vaccination in the past                                                                               | <input type="checkbox"/> yes                                                                                                                                                                                                                                                                                                                          | <input type="checkbox"/> no                                                                                                   | <input type="checkbox"/> don't know            |  |
| 5. Dengue infection in the past                                                                             | <input type="checkbox"/> yes                                                                                                                                                                                                                                                                                                                          | <input type="checkbox"/> no                                                                                                   | <input type="checkbox"/> don't know            |  |
| 6. Influenza vaccination in last year                                                                       | <input type="checkbox"/> yes                                                                                                                                                                                                                                                                                                                          | <input type="checkbox"/> no                                                                                                   | <input type="checkbox"/> don't know            |  |

**Alcohol Use test**

|                          |                                                                                                                                                                                                         |                               |
|--------------------------|---------------------------------------------------------------------------------------------------------------------------------------------------------------------------------------------------------|-------------------------------|
| <b>1. Participant ID</b> | <input type="checkbox"/> |                               |
| 1.1 Interview Date       | DoDa <input type="checkbox"/>                                                                                                                                                                           | BaVi <input type="checkbox"/> |
| 1.2 Name of interviewer  |                                                                                                                                                                                                         |                               |
| Date of Interview        | __ / __ / __ (Day/Month/Year)                                                                                                                                                                           |                               |

2. Do you drink alcohol once per week or more?

 Yes (continue)       No (stop here)

If Yes, how long have you been drinking for      \_\_ \_\_ years

If Yes, record the usual amount drunk:

| Type of drink | Alcohol (%)* | Amount drunk per day (ml) <sup>†</sup> | No. days/week |
|---------------|--------------|----------------------------------------|---------------|
|               |              |                                        |               |
|               |              |                                        |               |
|               |              |                                        |               |
|               |              |                                        |               |

\*If they are not sure about % alcohol refer to the typical drink strengths chart below.

<sup>†</sup> If they are not sure about the volume drunk per day refer to typical drink sizes overleaf

Example:

If the patient drinks 4 x 330ml cans of beer (5%) every day, and 2 x 200ml glasses of whiskey (40%) on Saturday and Sunday then enter:

| Type of drink | Alcohol (%) | Amount drunk per day (ml) | No. days/week |
|---------------|-------------|---------------------------|---------------|
| Beer          | 5           | 1320 (i.e. 330 x 4)       | 7             |
| Whiskey       | 40          | 400 (i.e. 200 x 2)        | 2             |

**Typical drink strengths**

|                         |     |                       |     |
|-------------------------|-----|-----------------------|-----|
| Beer                    | 5%  | Rice alcohol (strong) | 40% |
| Grape wine              | 12% | Whiskey/spirits       | 40% |
| Rice alcohol (moderate) | 30% |                       |     |

Typical drink sizes

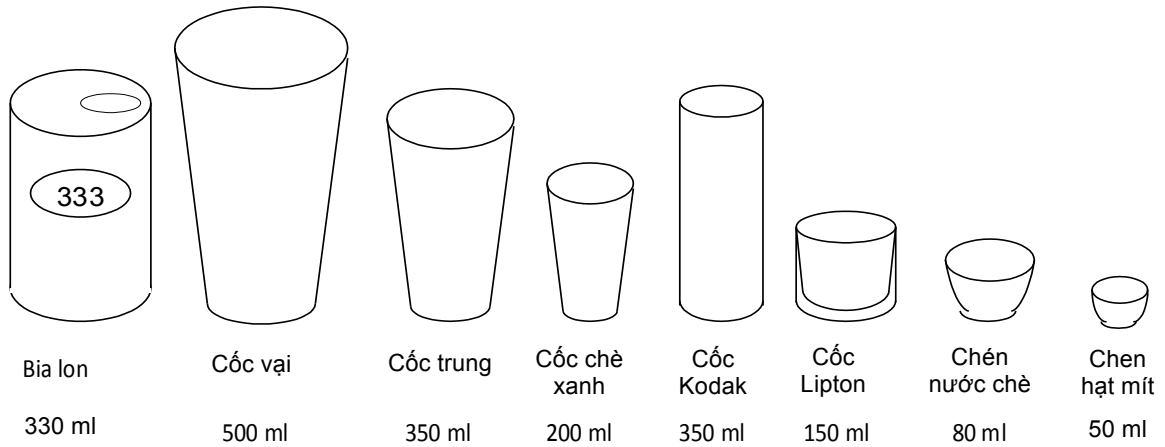

Supplement: pone.0091999.s002.pdf [file pone.0091999.s002.pdf]
